# Supplementary material for: Diversity, abundance and activity of ammonia-oxidizing microorganisms in fine particulate matter
Source: PubMed Central journal article supplement (PMC5150234; doi:10.1038/srep38785), 2016-12-12
Supplement: srep38785-s1.pdf [file srep38785-s1.pdf]

## **Supplementary Material**

### **Diversity, abundance and activity of ammonia-oxidizing microorganisms in fine particulate matter**

Jing-Feng Gao \*, Xiao-Yan Fan, Kai-Ling Pan, Hong-Yu Li and Li-Xin Sun

Correspondence and phone calls about the paper should be directed to Jing-Feng Gao at the following address, phone and fax number, and e-mail address:

#### **Jing-Feng Gao**

College of Environmental and Energy Engineering, Beijing University of Technology, 100 Pingleyuan, Chaoyang District, Beijing 100124, China

Tel: +86-10-6739-2627(office); Fax: +86-10-6739-1983

E-mail: [gao.jingfeng@bjut.edu.cn](mailto:gao.jingfeng@bjut.edu.cn) or [gao158@gmail.com](mailto:gao158@gmail.com)

**Supplementary Table S1** AOA and AOB sequence diversity and Good's coverage of the six PM<sub>2.5</sub> clone libraries.

**Supplementary Table S2** Concentrations of OC, EC, water-soluble inorganic ions and atmospheric pollutants of six cities in BTH.

**Supplementary Table S3** Comparisons of AOA and AOB *amoA* gene abundances in different types of samples from literature.

**Table S1** AOA and AOB sequence diversity and Good's coverage of the six PM<sub>2.5</sub> clone libraries

| Target gene          | Sample_ID | Numbers of sequences | OTUs(3% cut-off) | Good's coverage/(%) | Chao1 | OUT observed/OUT estimated(%) | Shannon index | ACE  | Simpson |
|----------------------|-----------|----------------------|------------------|---------------------|-------|-------------------------------|---------------|------|---------|
| AOA <i>amoA</i> gene | BJ        | 24                   | 1                | 100.00              | 1.00  | 100.00                        | 0.00          | 0.00 | 1.00    |
|                      | LF        | 26                   | 1                | 100.00              | 1.00  | 100.00                        | 0.68          | 0.00 | 0.49    |
|                      | TJ        | 27                   | 2                | 96.30               | 2.00  | 100.00                        | 0.16          | 0.00 | 0.93    |
|                      | BDH       | 25                   | 1                | 96.00               | 1.00  | 100.00                        | 0.17          | 0.00 | 0.92    |
|                      | TS        | 27                   | 5                | 85.19               | 11.00 | 45.45                         | 0.62          | 0.00 | 0.72    |
|                      | BD        | 28                   | 1                | 100.00              | 1.00  | 100.00                        | 0.00          | 0.00 | 1.00    |
| AOB 16S rRNA         | BJ        | 20                   | 4                | 100.00              | 4.00  | 100.00                        | 1.19          | 4.00 | 1.00    |
|                      | LF        | 15                   | 4                | 93.33               | 4.00  | 100.00                        | 1.16          | 4.70 | 0.93    |
|                      | TJ        | 18                   | 6                | 90.89               | 7.00  | 85.71                         | 1.40          | 6.27 | 0.91    |
|                      | BDH       | 20                   | 2                | 95.00               | 2.00  | 100.00                        | 0.20          | 0.00 | 0.95    |
|                      | TS        | 16                   | 5                | 93.75               | 5.00  | 100.00                        | 1.42          | 5.55 | 0.94    |
|                      | BD        | 20                   | 6                | 90.00               | 6.50  | 92.31                         | 1.53          | 7.72 | 0.90    |

**Table S2** Concentrations of OC, EC, water-soluble inorganic ions and atmospheric pollutants of six cities in BTH

| Cities | OC    | EC   | Na <sup>+</sup> | NH <sub>4</sub> <sup>+</sup> | K <sup>+</sup> | Mg <sup>2+</sup> | Ca <sup>2+</sup> | F <sup>-</sup> | Cl <sup>-</sup> | NO <sub>2</sub> <sup>-</sup> | NO <sub>3</sub> <sup>-</sup> | SO <sub>4</sub> <sup>2-</sup> | NO <sub>2</sub> * | SO <sub>2</sub> * | O <sub>3</sub> *  | CO*           | HNO <sub>3</sub> |
|--------|-------|------|-----------------|------------------------------|----------------|------------------|------------------|----------------|-----------------|------------------------------|------------------------------|-------------------------------|-------------------|-------------------|-------------------|---------------|------------------|
| BJ     | 4.07  | 2.97 | 0.00            | 0.1                          | 0.01           | 1.16             | 2.76             | 0.00           | 0.11            | 0.01                         | 1.05                         | 2.69                          | 66.45±2<br>8.15   | 33.04±4<br>.95    | 115.16±<br>102.51 | 1.92±<br>0.38 | 0.193±<br>0.154  |
| LF     | 4.39  | 3.56 | 0.01            | 0.08                         | 0.01           | 0.43             | 2.05             | 0.01           | 0.09            | 0.01                         | 0.42                         | 2.00                          | 30.52±1<br>5.84   | 27.22±1<br>4.31   | 143.87±<br>59.53  | 0.64±<br>0.23 | 0                |
| TJ     | 6.45  | 5.14 | 0.01            | 0.31                         | 0.01           | 0.72             | 2.40             | 0.01           | 0.36            | 0.01                         | 0.67                         | 2.34                          | 68.22±3<br>4.26   | 28.96±2<br>2.79   | 54.26±<br>45.72   | 1.80±<br>0.67 | 0                |
| BDH    | 4.56  | 3.88 | 0.00            | 0.06                         | 0.01           | 0.55             | 1.79             | 0.00           | 0.07            | 0.02                         | 0.52                         | 1.75                          | 30.22±1<br>5.12   | 62.48±1<br>3.77   | 46.35±<br>15.13   | 0.63±<br>0.43 | 0                |
| TS     | 14.47 | 8.61 | 0.03            | 0.23                         | 0.00           | 2.1              | 3.82             | 0.03           | 0.27            | 0.00                         | 1.86                         | 3.72                          | 60.48±3<br>2.28   | 81.17±5<br>1.68   | 182.87±<br>88.58  | 3.30±<br>3.08 | 0                |
| BD     | 11.97 | 8.84 | 0.01            | 0.05                         | 0.01           | 1.39             | 3.75             | 0.01           | 0.06            | 0.01                         | 1.25                         | 3.66                          | 26.42±7<br>.17    | 37.74±1<br>7.61   | 46.53±<br>17.26   | 0.95±<br>0.76 | 0                |

\*: Concentrations of atmospheric pollutants (NO<sub>2</sub>, SO<sub>2</sub>, O<sub>3</sub> and CO) were the average of that obtained hourly from the China National Environmental Monitoring Center (<http://113.108.142.147:20035/emcpublish/>).

The unit of all the pollutants was µg m<sup>-3</sup>, except CO (mg m<sup>-3</sup>).

**Table S3** Comparisons of AOA and AOB *amoA* gene abundances in different types of samples from literature.

| Reference | Samples                                        | AOA <i>amoA</i> gene                                             | AOB <i>amoA</i> gene                                           | AOA <i>amoA</i> gene of our study compared to the reference | AOB <i>amoA</i> gene of our study compared to the reference |
|-----------|------------------------------------------------|------------------------------------------------------------------|----------------------------------------------------------------|-------------------------------------------------------------|-------------------------------------------------------------|
| 1         | <b>Sandy soils</b>                             | $7.0 \times 10^6$ - $1.0 \times 10^8$ cell /g dry soil           | $2.4 \times 10^4$ - $2.0 \times 10^7$ cell /g dry soil         | Lower (<)                                                   | Higher (>)                                                  |
| 2         | <b>Paddy soils</b>                             | $7.7 \times 10^6$ - $1.8 \times 10^7$ cell/g paddy soil          | $9.7 \times 10^5$ - $2.6 \times 10^6$ cell/g paddy soil        | Lower (<)                                                   | Higher (>)                                                  |
| 3         | <b>Soils</b>                                   | $2.52 \times 10^5$ - $3.36 \times 10^8$ cell/g soil              | $1.2 \times 10^5$ – $3.3 \times 10^7$ cell/g soil              | Comparable (~)                                              | Higher (>)                                                  |
| 4         | <b>Compost samples</b>                         | $2.8 \times 10^8$ - $1.1 \times 10^9$ cell /g DW composst sample | $8.8 \times 10^7$ - $1 \times 10^9$ cell /g DW composst sample | Lower (<)                                                   | Comparable (~)                                              |
| 5         | <b>Activated sludge</b> (Saline sewage)        | $1.7 \times 10^2$ to $3.8 \times 10^3$ cell/ng DNA               | $1.2 \times 10^3$ to $9.2 \times 10^4$ cell/ng DNA             | Lower (<)                                                   | Lower (<)                                                   |
| 6         | <b>Activated sludge</b> (Municipal wastewater) | $3.07 \times 10^5$ cell/g sludge                                 | $2.9 \times 10^7$ cell/g sludge                                | Higher (>)                                                  | Comparable (~)                                              |
| 7         | <b>Activated sludge</b> (Domestic wastewater)  | $6.0 \times 10^5$ - $4.5 \times 10^6$ cell/g sludge              | $2.9 \times 10^3$ - $6.8 \times 10^4$ cell/g sludge            | Comparable (~)                                              | Higher (>)                                                  |
| 8         | <b>Sediment</b> (a eutrophic river)            | $1.48 \times 10^7$ - $5.50 \times 10^7$ cell/g dry sediment      | $1.6 \times 10^4$ - $7.0 \times 10^4$ cell/g dry sediment      | Comparable (~)                                              | Higher (>)                                                  |

The abundance of AOA and AOB are transformed to cell number based on that there are 1 and 2.5 *amoA* genes per AOA and AOB.

## References:

1. Leininger, S. et al. Archaea predominate among ammonia-oxidizing prokaryotes in soils. *Nature* **442**, 806-809 (2006).
2. Wang, J., Wang, W. & Gu, J. Community structure and abundance of ammonia-oxidizing archaea and bacteria after conversion from soybean to rice paddy in albic soils of northeast China. *Appl. Microbiol. Biotechnol.* **98**, 2765-2778 (2014).
3. Hu, H., Zhang, L., Dai, Y., Di, H. & He, J. Ph-dependent distribution of soil ammonia oxidizers across a large geographical scale as revealed by high-throughput pyrosequencing. *J. Soil Sediment* **13**, 1439-1449 (2013).
4. Zeng, G. et al. Relative contributions of archaea and bacteria to microbial ammonia oxidation differ under different conditions during agricultural waste composting. *Bioresour Technol.* **102**, 9026-9032 (2011).
5. Jin, T., Zhang, T. & Yan, Q. Characterization and quantification of ammonia-oxidizing archaea (AOA) and bacteria (AOB) in a nitrogen-removing reactor using T-RFLP and qPCR. *Appl. Microbiol. Biotechnol.* **87**, 1167-1176 (2010).
6. Gao, J., Luo, X., Wu, G., Li, T. & Peng, Y. Quantitative analyses of the composition and abundance of ammonia-oxidizing archaea and ammonia-oxidizing bacteria in eight full-scale biological wastewater treatment plants. *Bioresour Technol.* **138**, 285-296 (2013).
7. Bai, Y., Sun, Q., Wen, D. & Tang, X. Abundance of ammonia-oxidizing bacteria and archaea in industrial and domestic wastewater treatment systems. *FEMS Microbiol. Ecol.* **80**, 323-330 (2012).
8. Wang, Z., Wang, Z., Huang, C. & Pei, Y. Vertical distribution of ammonia-oxidizing archaea (AOA) in the hyporheic zone of a eutrophic river in north China. *World J. Microbiol. Biotechnol.* **30**, 1335-1346 (2014).
